# Supplementary material
Source: MDPI journal article supplement (https://www.mdpi.com/2072-4292/12/20/3423)
Supplement: s1 [file s1]

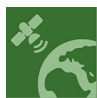**Supplementary Table 1.** lithology units and their descriptions in the study area

| G | Unit   | Description                                                                            |
|---|--------|----------------------------------------------------------------------------------------|
|   | Cm     | Dark grey to black fossiliferous limestone with subordinate black shale                |
| A | Cl     | Dark red meddium - grained arkosic to subarkosic sandstone and micaceous siltstone     |
| B | Dp     | light red to white, thick bedded quartzarenite with dolomite intercalations and gypsum |
|   | DCkh   | dark grey limestone, greenish marl and shale, locally includin gypsum                  |
|   | Ekh    | Olive - green shale and sandstone                                                      |
| C | E1m    | Marl, gypsiferous marl and limestone                                                   |
|   | Jsc    | Conglomerate                                                                           |
|   | Jd     | greenish - grey argillaceous limestone with intercalations of calcareous shale         |
| D | Jl     | Light grey, thin - bedded to massive limestone                                         |
|   | Jmz    | Grey thick - bedded limestone and dolomite                                             |
|   | Jch    | Dark grey argillaceous limestone and marl                                              |
|   | Kat    | Olive green glauconitic sandstone and shale                                            |
|   | Ksn    | Grey to block shal and thin layers of siltstone and sandstone                          |
|   | Ksr    | Ammonite bearing shale with intercation of orbitolin limestone                         |
|   | Ku     | Upper cretaceous, undifferentiated rocks                                               |
| E | Kad-ab | Undifferentiated unit including argillaceous limestone, marl and shale                 |
|   | Kl     | Lower Cretaceous undifferentiated rocks                                                |
|   | K      | Cretaceous rocks ingeneral                                                             |
|   | Ktr    | Grey oolitic and bioclastic orbitolina limestone                                       |
|   | Murm   | Ligth - red to brown marl and gypsiferous marl with sandstone intercalations           |
| F | Murm   | Gypsiferous marl                                                                       |
|   | g      |                                                                                        |
|   | PlQc   | Fluvial conglomerate, Piedmont conglomerate and sandstone.                             |
|   | Pz     | Undifferentiated lower Paleozoic rocks                                                 |
|   | pC-C   | Late proterozoic - early Cambrian undifferentialed rocks                               |
|   | Pr     | Dark grey medium - bedded to massive limestone                                         |
|   | Pz1a.b |                                                                                        |
| G | v      | Andesitic basaltic volcanic                                                            |
|   | Pd     | Red sandstone and shale with subordinate sandy limestone                               |
|   | pCmt2  | Low - grade, regional metamorphic rocks (Green Schist Facies )                         |
|   | Plc    | Polymictic conglomerate and sandstone                                                  |
|   | P      | Undifferentiated Permian rocks                                                         |
|   | Qsw    | Swamp                                                                                  |
|   | Qft2   | Low level piedment fan and vally terrace deposits                                      |
|   | Qm     | Swamp and marsh                                                                        |
| H | Qft1   | High level piedmont fan and vally terrace deposits                                     |
|   | Qs,d   | Unconsolidated wind blown sand deposite including sand dunes                           |
|   | Qal    | Stream channel, braided channel and flood plain deposites                              |

|   |      |                                                                                        |
|---|------|----------------------------------------------------------------------------------------|
|   | TRe  | thick bedded grey o'olitic limestone ; thin - platy, yellow to pinkish shaly limestone |
| J | TRe2 | Thick bedded dolomite                                                                  |
|   | TRJs | Dark grey shale and sandstone                                                          |

---
